# A signal of competitive dominance in mid-latitude herbaceous plant communities

José A. Capitán<sup>1,2</sup>, Sara Cuenda<sup>3</sup>, Alejandro Ordóñez<sup>4</sup>, and David Alonso<sup>2</sup>

<sup>1</sup>Department of Applied Mathematics. Technical University of Madrid. Av. Juan de Herrera, 6. 28040 Madrid, Spain.

<sup>2</sup>Theoretical and Computational Ecology. Center for Advanced Studies (CEAB-CSIC). C. Accés Cala St. Francesc 14. 17300 Blanes, Catalonia, Spain.

<sup>3</sup>Universidad Autónoma de Madrid. Facultad de Ciencias Económicas y Empresariales. Depto. Análisis Económico: Economía Cuantitativa. C. Francisco Tomás y Valiente 5, 28049 Madrid, Spain

<sup>4</sup>Department of Bioscience. Aarhus University, Aarhus. Ny Munkegade 114, DK-8000, Aarhus C, Denmark.

August 9, 2021

---

|                                 |                                                                                    |
|---------------------------------|------------------------------------------------------------------------------------|
| <b>Corresponding author</b>     | José A. Capitán / David Alonso                                                     |
| <b>Address</b>                  | Department of Applied Mathematics<br>Av. Juan de Herrera, 6<br>28040 Madrid, Spain |
| <b>Phone / Fax</b>              | +34-913 36 7594 / +34-913 36 7806                                                  |
| <b>E-mail José A. Capitán</b>   | <a href="mailto:ja.capitan@upm.es">ja.capitan@upm.es</a>                           |
| <b>E-mail Sara Cuenda</b>       | <a href="mailto:sara.cuenda@uam.es">sara.cuenda@uam.es</a>                         |
| <b>E-mail Alejandro Ordóñez</b> | <a href="mailto:alejandro.ordonez@bios.au.dk">alejandro.ordonez@bios.au.dk</a>     |
| <b>E-mail David Alonso</b>      | <a href="mailto:dalonso@ceab.csic.es">dalonso@ceab.csic.es</a>                     |
| <b>Type of Article</b>          | Letter                                                                             |
| <b>Running title</b>            | Competitive dominance in plant communities                                         |
| <b>Words Abstract</b>           | 150                                                                                |
| <b>Words Main Text</b>          | ≈3100                                                                              |
| <b>Figures / Tables</b>         | 6 / 0                                                                              |
| <b>References</b>               | 67                                                                                 |
| <b>Text Boxes</b>               | 0                                                                                  |

---

**Statement of authorship:** JAC and DA designed the research; JAC and SC performed the statistical analysis; JAC, SC, AO and DA analyzed data and results; AO prepared data files and contributed materials; JAC and DA wrote the paper.

**Data accessibility statement and code availability:** The LEDA Traitbase is an open internet data base, and data can be downloaded from <https://uol.de/en/landeco/research/leda>. The data base of Atlas Florae Europaeae that supports the findings of this study is available from the Committee for Mapping the Flora of Europe and Societas Biologica Fennica Vanamo (<https://www.luomus.fi/en/publishing-atlas-florae-europaeae>). MODIS data for actual ET are also publicly available (<http://www.ntsg.umd.edu/project/modis/mod17.php>).

Data and code for replicability of our results is available on Dryad repositories at the following url during the peer review process: <https://datadryad.org/stash/share/7RnYGm7lio37dtLPZ0M8CaGjBXLZwU58ZDunRijUJxk>.

1

## Abstract

2

3

4

5

6

7

8

9

10

11

Understanding the main determinants of species coexistence across space and time is a central question in ecology. However, ecologists still know little about the scales and conditions at which biotic interactions matter and how these interact with the environment to structure species assemblages. Here we use recent theory developments to analyze plant distribution and trait data across Europe and find that plant height clustering is related to both evapotranspiration and gross primary productivity. This clustering is a signal of interspecies competition between plants, which is most evident in mid-latitude ecoregions, where conditions for growth (reflected in actual evapotranspiration rates and gross primary productivities) are optimal. Away from this optimum, climate severity likely overrides the effect of competition, or other interactions become increasingly important. Our approach bridges the gap between species-rich competition theories and large-scale species distribution data analysis.

12

**Keywords:** Ecological community dynamics Plant diversity Species coexistence Biogeographic patterns

13

Null hypotheses testing Stochastic Markov processes in continuous time.

## 14 **Introduction**

15 Biodiversity theory in community ecology heavily relies on the pioneering work of Volterra (1926) and Lotka  
16 (1925). These authors provided a general framework to mathematically describe the interacting dynamics of nat-  
17 ural populations. These seminal ideas have been extensively developed mostly focusing on the analysis of simple  
18 ecological communities. For instance, Chesson and colleagues (Chesson, 2000, Ellner *et al.*, 2019, HilleRisLam-  
19 bers *et al.*, 2011, Mayfield & Levine, 2010) introduce a general framework —the *modern coexistence theory* for  
20 competitive communities— to understand species coexistence in natural communities based on pair-wise species  
21 differences and their interplay to determine effective competitive (biotic) interactions. According to this frame-  
22 work, the balance between stabilizing trait differences and species dominance among competitors is crucial to  
23 understand species coexistence. In communities driven by fitness differences, species turn out to be clustered  
24 around similar trait values selected through competitive dominance. However, trait clustering may arise through  
25 two radically different mechanisms. Independent adaptation of non-interacting species to the same environmental  
26 conditions can lead to trait clustering. The alternative explanation would say that competitive interactions leading  
27 to fitness equalization end up producing more similar species, with, therefore, more similar traits. Therefore, trait  
28 clustering may be interpreted as a fingerprint of competition even in the absence of environmental filtering (Kraft  
29 *et al.*, 2015, Mayfield & Levine, 2010). These ideas have been proved challenging to apply to large ecological  
30 communities. Rather than focusing on whether (or not) and why ecological similarity among species should arise  
31 (or not) in natural communities, Hubbell and colleagues assumed ecological equivalence as a first principle and  
32 studied the consequences of this assumption for species coexistence and community-level patterns in species-rich  
33 systems (Alonso *et al.*, 2006, Hubbell, 2001, Rosindell *et al.*, 2011). Other authors, building on the May's sem-  
34 inal work (1972), have used a random matrix approach to advance understanding on species coexistence in large  
35 communities through mathematical analysis (Allesina & Grilli, 2020, Allesina & Tang, 2012, 2015, Serván *et al.*,  
36 2018). Statistical physics has also helped to understand how pair-wise species interactions scale up to determine  
37 the type of dynamic stability and potential species coexistence in species-rich large systems (Bunin, 2017).

38 Although the role of local interactions at determining large-scale diversity patterns is still controversial (Rick-  
39 lefs, 2008), community ecology lacks a comprehensive theoretical framework able to explore quantitatively to  
40 what extent the role of biotic, species-to-species interactions is relevant to determine species composition and  
41 diversity across large spatial scales. Empirical studies, while they may be able to independently assess environ-  
42 mental stress and species competitive abilities, are often limited to small community sizes (Violle *et al.*, 2011) or  
43 restricted to single habitats (Kunstler *et al.*, 2012). Very few studies have explored the idea of competition as a  
44 driver of community assembly across biogeographic regions (Kunstler *et al.*, 2016, Swenson *et al.*, 2012). Here we  
45 attempted a continent-wide macro-ecological study of species assemblage patterns based on theoretical predictions  
46 from a trait-driven theory of competitive dominance, based on extensions of a type of Lotka-Volterra models. Our  
47 theory applies to large ecological communities at large geographical scales where species can be ranked in their

48 competitive ability according to certain species trait values (Capitán *et al.*, 2020).

49 Light and water availability (Fig. 1) impose significant limitations on gross primary productivity which is re-  
50 flected in actual evapotranspiration rates (Garbulsky *et al.*, 2010). These two resources vary at regional scales,  
51 placing strong, sometimes opposing constraints on how tall a plant can grow. Plant height is a fundamental trait  
52 that reflects the ability of the individual to optimize its own growth within its local biotic environment and regional  
53 physical constraints (see Falster & Westoby (2003), Holmgren *et al.* (1997) and references therein). How plant  
54 height adapts to these opposing constraints has been studied in trees (King, 1990, Law *et al.*, 1997, Midgley, 2003)  
55 and herbaceous plants (Givnish, 1995, 1982). Here we analyzed presence-absence matrices of floral herbaceous  
56 taxa across different European ecoregions to determine if competitive ability (reflected in maximum stem height)  
57 could help explain assemblage patterns at local scales across gradients of relevant environmental factors such as  
58 evapotranspiration. We examined how well observed plant assemblages at macro-ecological scales match theoret-  
59 ical predictions generated by a synthetic, stochastic framework of community assembly (Capitán *et al.*, 2015, 2017,  
60 Haegeman & Loreau, 2011, McKane *et al.*, 2000, Solé *et al.*, 2000), which we described in full detail in Capitán  
61 *et al.* (2020). By assuming that competition between hetero-specifics is driven by signed height differences, we  
62 found a significant positive correlation between the degree of clustering and actual evapotranspiration rates (or  
63 gross primary productivity, GPP). Across Europe, actual evapotranspiration (and GPP) is lower at more southern  
64 latitudes (due to reduced precipitation levels) as well as at more northern latitudes (due to colder temperatures  
65 and low levels of sunlight). Herbaceous plant height clustering is significant only over a latitudinal band where  
66 environmental constraints to plant growth are weaker, which suggests that the signature of competitive dominance  
67 can only be detected in the assemblage patterns of mid-latitude ecoregions.

## 68 **Theoretical predictions**

69 Recently, we presented a stochastic framework of community assembly (Capitán *et al.*, 2020). This framework  
70 provides a stochastic extension of Lotka-Volterra competition models. While other extensions consider only  
71 symmetric competition on theoretical grounds (Haegeman & Loreau, 2011), our approach relates specifically  
72 measurable species traits and competitive dominance. In order to make this contribution self-contained, we first  
73 provide a summary of the main predictions from our theory (Capitán *et al.*, 2020). We developed first a single-trait  
74 driven, spatially-implicit species-competition model. Then, we extended this model into space and incorporated a  
75 second trait controlling species competition. Both models together provided us with rich predictions that can be  
76 tested with appropriate species assembly data. Below we summarize these predictions.

## 77 **Two predictions from the implicit model**

### 78 **Species coexistence decays with competition intensity**

79 Recent theoretical approaches have focused on predicting analytically the expected fraction of species that survive  
80 in competitive scenarios (Serván *et al.*, 2018). A spatially-implicit model of Lotka-Volterra type (Capitán *et al.*,  
81 2020) allowed us to predict on average how many species are expected to survive as a function of mean competitive  
82 strengths. We observed that the fraction of extant species  $p_c$ , which we called “coexistence probability”, decays  
83 with the average competitive strength  $\langle \rho \rangle$  as a power law above a certain threshold in competition, and curves for  
84 different pool sizes  $S$  can be collapsed into the same curve following the mathematical dependence,

$$p_c \sim (\langle \rho \rangle S)^{-\gamma}, \quad (1)$$

85 which was observed numerically and justified analytically (see Capitán *et al.* (2020)). We showed that the exponent  
86  $\gamma$  is controlled by the immigration rate  $\mu$ . This is the first prediction of the spatially implicit model.

### 87 **Species clustering under competitive dominance**

88 In order to explore the significance of competitive dominance in empirical communities, we applied first random-  
89 ization tests to model communities. In this way, we established a second prediction for this model. Null models  
90 for community assembly (Chase *et al.*, 2011, Gotelli *et al.*, 2010, Webb *et al.*, 2002) compare the properties of  
91 actual communities against random samples of the same size extracted from a species pool (observed diversity at  
92 the ecoregion level). This approach assumes that realized communities are built up through the independent ar-  
93 rival of equivalent species from the pool (Alonso *et al.*, 2015, MacArthur & Wilson, 1967, Ontiveros *et al.*, 2019)  
94 regardless of species preferences for particular environments or species interactions. Our randomization tests were  
95 based on a single statistic, the competitive strength averaged over species present in realized model communities,  
96 which were then compared to random samples of the same size drawn from the species pool. The null hypothesis  
97 (i.e., empirical communities are built as random assemblages from the ecoregion) can be rejected in both sides of  
98 the distribution, implying signals of ‘significant trait overdispersion’ (‘clustering’) if average trait differences are  
99 larger (smaller) than expected at random. In the low immigration regime, the model predicts a significant signal  
100 of clustering. This regime is characterized by a low non-dimensional immigration rate ( $\lambda = \mu/(\alpha K)$  much lower  
101 than 0) —here  $\alpha$  stands for the average species growth rate in isolation, and  $K$  is the carrying capacity of the  
102 environment.

## 103 **Two predictions from the explicit model**

104 The spatially-explicit model incorporates a trade-off between potential growth and the production of allelopathic  
105 compounds. This alternative mechanism would allow shorter individuals to overcome being out-competed by taller

106 plants (see Capitán *et al.* (2020)). Our models explores how taller species, which are better competitors for light,  
107 and shorter ones, which allocate more energy in allelopathic compounds, coexist in a single interacting community  
108 on a given area (Fig. 1).

### 109 **Competitive dominance may select for shorter plants**

110 Height hierarchies alone, as assumed in our spatially-implicit model, lead to the selection of taller plants in species  
111 assemblages. In the more realistic spatially-explicit model, species processes take place on a lattice where locally  
112 taller plants grow faster than neighbors because they are less shaded, but in the presence of heterospecific neigh-  
113 bors, they are also more prone to die. Computer simulations show that the balance of these two mechanisms can  
114 end up selecting plant sizes characterized by an optimal potential height that can be either shifted toward lower  
115 or higher values depending on the choice of model parameters. This is the first prediction of the spatially-explicit  
116 model: species abundance distributions are not necessarily biased towards taller individuals, and they can peak at  
117 species at intermediate or even shorter heights. In any case, and consistently, in this more complex scenario, a  
118 balance between the gains of potential growth and the gains of energy allocation in allelopathy (as an example of a  
119 non-size-related, alternative mechanism) may result in a selection for plants exhibiting significant height clustering  
120 at stationarity.

### 121 **Clustering patterns hold across aggregation scales**

122 A second result that can be derived from the spatially-explicit model is related to the persistence of trait clustering  
123 when species are aggregated over spatial scales larger than local interaction distances. Our spatially-explicit model  
124 can help explain why clustering patterns persist over large scales. The distributions of species within a region may  
125 reveal more information about the underlying assembly processes than the co-occurrence of species at any given  
126 location (Ricklefs, 2008). As species are aggregated over lattice cells of increasing size, clustering patterns hold  
127 even at scales much larger than local interaction distances. The model predicts consistent clustering patterns  
128 regardless of the aggregation scale used to define species communities. This was the second prediction, derived  
129 and carefully analyzed in Capitán *et al.* (2020), from our spatially-explicit model.

## 130 **Materials and methods**

131 Plant community data were drawn from Atlas Florae Europaeae (Jalas & Suominen, 1964–1999). The distribution  
132 of flora is geographically described using equally-sized grid cells ( $\sim 50 \times 50$  km) based on the Universal Transverse  
133 Mercator projection and the Military Grid Reference System, see Fig. 2. Each cell was assigned to a dominant  
134 habitat type based on the WWF Biomes of the World classification (Olson *et al.*, 2001), which defines different  
135 ecoregions, i.e., geographically distinct assemblages of species subject to similar environmental conditions. We  
136 consider each cell in an ecoregion to represent a species aggregation.

137 Each herbaceous species in an ecoregion was characterized by its maximum stem height  $H$ , an eco-morphological  
138 trait that relates to several critical functional strategies among plants (Díaz *et al.*, 2015). It represents an optimal  
139 trade-off between the gains of accessing light (King, 1990, Law *et al.*, 1997), water and nutrient transport from  
140 soil (Midgley, 2003, Ryan & Yoder, 1997), and additional constraints posed by the local biotic environment of  
141 each individual plant, such as competition, facilitation, or herbivory.

142 Mean height values were obtained from the LEDA database (Kleyer *et al.*, 2008) for as many species as there  
143 were available in the database. Missing values were taken from (Ordóñez *et al.*, 2010) or inferred using a MICE  
144 (Multivariate Imputation by Chained Equations) approach (Buuren & Groothuis-Oudshoorn, 2011) together with  
145 a predictive mean matching algorithm based on other available traits (leaf and seed traits), genus, and growth  
146 forms as predictors. Based on plant growth forms, 2610 herbaceous species (aquatic, herbs, or graminoid) were  
147 considered in this work.

148 Maximum stem height values spanned several orders of magnitude, so we used a log-transformed variable  
149 ( $h = \log H$ ) to measure species differences (using non-transformed heights yielded comparable results, here not  
150 shown). The values of  $h$  were standardized within ecoregions as  $t = (h - h_{\min}) / (h_{\max} - h_{\min})$  so that  $0 \leq t \leq 1$ .

151 For all the species reported in an ecoregion, we formed an empirical competition matrix with pairwise  $\rho_{ij}$   
152 signed height differences  $\rho_{ij} = \hat{\rho}(t_j - t_i)$ , where  $t_i$  are height values standardized across ecoregions and sorted  
153 in increasing order. The advantage of having these values represent trait differences between pairs of species is  
154 that any trend in competitive strengths can be immediately translated into patterns of functional trait clustering or  
155 overdispersion. As suggested in Capitán *et al.* (2020), we calculated the average pair-wise competitive strength as

$$\langle \rho \rangle = \frac{2}{S(S-1)} \sum_{i=1}^S \sum_{j=i+1}^S |\rho_{ij}|, \quad (2)$$

156 where  $S$  stands for ecoregion richness.

157 In an ecoregion with richness  $S$ , a number  $s_k \leq S$  of species will form a species assemblage at cell  $k$ . The  
158 coexistence probability was calculated from data as the average fraction of species that survive per cell,

$$p_c = \frac{\langle s \rangle}{S} = \frac{1}{SN_C} \sum_{k=1}^{N_C} s_k, \quad (3)$$

159 with  $N_C$  representing the number of cells in the ecoregion. This quantity, together with the distribution of trait  
160 differences in cells, was used to compare model predictions with real data.

161 Evapotranspiration maps were obtained from data estimated through remote sensing. Evapotranspiration  
162 data at different spatial and temporal resolutions were taken from the MODIS Global Evapotranspiration Project  
163 (MOD17), a part of the NASA/EOS project to estimate terrestrial ET from land masses by using satellite remote  
164 sensing information (<http://www.ntsg.umd.edu/project/modis/mod17.php>). Available datasets estimate ET using the  
165 improved algorithm by Mu *et al.* (2011).

## 166 **Randomization tests**

167 Following Triadó-Margarit *et al.* (2019), our randomization tests applied to empirical communities were based on  
168 the average competitive strength observed in a cell  $C$  formed by  $s$  species,

$$\langle \rho \rangle_C = \frac{2}{s(s-1)} \sum_{i=1}^s \sum_{j=i+1}^s |\rho_{ij}^C|, \quad (4)$$

169 where  $(\rho_{ij}^C)$  is the submatrix of the ecoregion competition matrix restricted to the species present in the cell.  
170 Compared to ecoregion samples, the lower (higher) the empirical community average  $\langle \rho \rangle_C$  is, the higher (lower)  
171 is the degree of species clustering in the cell. For each cell we calculated the probability  $p = \Pr(\langle \rho \rangle_Q \leq \langle \rho \rangle_C)$   
172 that the the competition average  $\langle \rho \rangle_Q$  randomly-sampled from the pool is smaller than the empirical average. At  
173 a 5% significance level, if  $p > 0.95$  the empirical competition average is significantly larger than the average  
174 measured for random pool samples, which implies that average trait differences in realized communities are larger  
175 than would be expected at random. On the other hand, if  $p < 0.05$ , observed trait differences are significantly  
176 smaller than would be expected at random. Therefore, if  $p > 0.95$ , the community exhibits ‘significant trait  
177 overdispersion’, whereas if  $p < 0.05$ , there is evidence for ‘significant trait clustering’ in the observed species  
178 assemblage.

## 179 **Results**

180 If larger plants capture more resources, evolution should favor investment in potential growth (maximum height) as  
181 a competitive mechanism. However, investment in alternative mechanisms, such as allelopathy, may help smaller  
182 plants stave off competitors, reducing local heterospecific plant cover and giving them a competitive advantage  
183 over potentially taller plant species. As a consequence, the maximum species stem height can be regarded as the  
184 outcome of an evolutionary game (Givnish, 1982) that balances opposing constraints, both physical (Craine &  
185 Dybzinski, 2013, Falster & Westoby, 2003) and biotic (King, 1990, Law *et al.*, 1997). To explore these opposing  
186 constraints, we analyzed plant data in the light of the two community assembly models. The first one is a spatially-  
187 implicit model of Lotka-Volterra type, and the second one is a straightforward spatially-explicit extension including  
188 height-driven competition and allelopathic effects. Both have been carefully defined and studied in Capitán *et al.*  
189 (2020).

## 190 **Two predictions from the implicit model tested against data**

### 191 **Species coexistence decays with competition intensity**

192 The collapse of curves predicted by Eq. (1) helps eliminate the variability in  $S$ , so that empirical coexistence  
193 probabilities, which arise from different ecoregion sizes, can be fitted together (Fig. 3). Confirming the first



194 prediction of the spatially-implicit model, we found a significant correlation between the probability of coexistence  
195 and the scaled competitive overlap based on empirical data (Fig. 3), indicating that a model driven solely by  
196 dominant competitive interactions reliably predicts the average richness of plant communities across ecoregions.  
197 In addition, this theoretical prediction allowed an indirect estimation of the relative importance  $\hat{\rho}$  of average inter-  
198 vs. intraspecific effects: the average ratio of inter- to intraspecific competition strength is about 5% (see Supporting  
199 Information, section A for details on the estimation procedure).

## 200 **Species clustering under competitive dominance**

201 As a second prediction, the implicit model predicts species clustering under competitive dominance under certain  
202 parameter regime. High levels of trait clustering are only found for low immigration rates and high carrying  
203 capacity values. Importantly, this is the parameter regime that seems to precisely emerges from the data. In Capitán  
204 *et al.* (2020) we derived a deterministic prediction for the exponent,  $\gamma = 1$ , under no immigration, which does not  
205 match the one obtained from data ( $\gamma = 0.61$ ). As we showed (Capitán *et al.*, 2020), it is a non-zero (but small)  
206 value of the immigration rate that determines the value of the power-law exponent  $\gamma$  that becomes lower than 1 in  
207 the case of non-zero immigration. Indeed, for a realistic fit in Fig. 3, the exponent of the empirical power law is  
208 obtained for  $\mu/\alpha \sim 0.1$  individuals per generation. Since plant communities operate in a low-immigration regime,  
209 the non-dimensional immigration rate  $\lambda = \mu/(\alpha K)$  must satisfy  $\lambda = 0.1/K \ll 1$ , hence the carrying capacity  
210 must be large. Indeed, in the same parameter regime where empirical coexistence probabilities are best predicted,  
211 this is, low immigration rate and high carrying capacity, the implicit model predicts a significant degree of species  
212 clustering [see Fig. 3 in Capitán *et al.* (2020)].

213 Testing this second prediction against empirical observations yields a mixed picture. We calculated  $p$ -values for  
214 randomization tests applied to every cell in each ecoregion, which represent the empirical distribution of  $p$ -values  
215 (Fig. 4). At the parameter values that make plant data consistent with the first prediction, the spatially-implicit  
216 model predicts significant trait clustering. We observe that some ecoregions are consistent with this theoretical  
217 expectation. However, other ecoregions clearly do not comply with this prediction. In addition, no ecoregion is  
218 consistent with trait overdispersion (Fig. 4). Selecting species in randomization tests according to species dispersal  
219 abilities portrays the same picture (results not shown).

## 220 **Ecoregion clustering and actual evapotranspiration rates**

221 We explored whether there is a geographic signal in the propensity of an ecoregion to exhibit clustering in maxi-  
222 mum stem height. For a better quantification, we defined a clustering index  $q$  for an ecoregion as the fraction of its  
223 cells that lie within the 5% range of significant clustering (randomization tests yield  $p$ -values smaller than 0.05 for  
224 those cells). An ecoregion for which significant clustering is found in most of its cells will tend to score high in the  
225  $q$  index. We examined how the clustering index varied across the continent in terms of the geographical location

226 of ecoregion centroids as well as with actual evapotranspiration (Fig. 5).

227 Water availability acts as a factor limiting plant growth at geographical scales (Fig. 1a). However, water has to  
228 be channeled up through stems and leaves for effective growth to take place. Therefore, at large geographic scales,  
229 growth primary productivity positively correlates with evapotranspiration (Garbulsky *et al.*, 2010), see Fig. 5d.  
230 Therefore, for a given region, mean annual evapotranspiration is a reliable measure of environmental constraints  
231 on plant growth (Garbulsky *et al.*, 2010). Panels a and b of Fig. 5 show a clear latitudinal trend: there is an in-  
232 termediate range of ecoregion latitudes where both clustering indices and evapotranspiration are large, indicating  
233 that evapotranspiration measures can robustly predict clustering indices (Fig. 5c). The same pattern can also be  
234 seen in the relation between mean relative height differences and actual evapotranspiration across individual grid  
235 cells. The intensity of the clustering pattern increases with actual evapotranspiration rates across Europe, not only  
236 at the ecoregional level (Fig. 5c), but also at the lower spatial scale of grid cells (see Fig. C1, Supporting Infor-  
237 mation). More importantly, since evapotranspiration is a powerful proxy of environmental constraints on plant  
238 growth, this clustering in maximum stem height appears to be stronger at ecoregions less limited by environmental  
239 conditions. As environments become harsher and less optimal for plant growth, these clustering patterns disappear.  
240 This is particularly true for the severe climatic conditions characteristic in the Mediterranean (with erratic rainfall,  
241 limited water availability and drought), as well as of boreal zones (with low radiation incidence and cold temper-  
242 atures). According to model predictions, the overall clustering patterns found at middle-range latitudes appear to  
243 be consistent with species competitive dominance shaping species height differences.

## 244 **Two predictions from the explicit model tested against data**

### 245 **Competitive dominance may select for shorter plants**

246 The spatially-explicit model allows for either the dominance of tall, mid-sized or short plants, as a consequence  
247 of the trade-off between investment in either potential growth or alternative mechanisms other than growth (see  
248 Fig. 5 in Capitán *et al.* (2020)). We have tested whether taller or shorter plants are most commonly represented  
249 in ecoregions via the correlation of cell-averaged heights and evapotranspiration (Fig. 6a), which shows a mixed  
250 picture. With few exceptions, mid-latitude ecoregions exhibit positive correlation (taller plants are selected in  
251 regions favoring plant growth), whereas negative dependencies are often observed in latitudinal extremes (Fig. 6b).  
252 Correlations are significant but, in some cases, very weak. These results are consistent with our interpretation in  
253 terms of a signal of competitive dominance in mid-latitude ecoregions.

### 254 **Clustering patterns hold across aggregation scales**

255 Our spatially-explicit model predicts the persistence of trait clustering as species are aggregated at larger spatial  
256 scales (much larger than the typical range of species interactions). This is important because real individual plants  
257 interact at much lower spatial scales (1 to 1000ha) compared to the spatial resolution of our dataset (grid cell sizes

258 about 50 km). To assess the robustness of our results, we further investigated the effect of aggregation scales  
259 on clustering patterns using plant data. In line with the spatially-explicit model, the analysis of herbaceous plant  
260 communities from mid-latitude ecoregions reveals that our results are robust to both up- and down-scaling com-  
261 munity sizes (see Fig 6c). Height clustering remains significant in a range of aggregated scales, and extrapolates to  
262 smaller areas (under a random placement hypothesis, communities of smaller sizes were built by randomly select-  
263 ing a number of species as predicted by the empirical species-area relation, see Supporting Information, section  
264 B). We conclude that clustering patterns at large scales is an emerging pattern that can be interpreted as a signature  
265 of competitive dominance operating at much smaller spatial scales.

## 266 Discussion

267 In this work we have tested predictions from a model of species-rich interacting communities under competitive  
268 dominance (Capitán *et al.*, 2020). Our work is based on spatial and stochastic extensions of a type of Lotka-Volterra  
269 models where competitive dominance is linked to species traits (Capitán *et al.*, 2020). This piece of theory was ini-  
270 tially inspired by the competition-similarity paradigm (Mayfield & Levine, 2010). We used macro-ecological trait  
271 data at large spatial scales (Kunstler *et al.*, 2016) to show that, while potential evapotranspiration decreases with  
272 latitude, actual evapotranspiration peaks at intermediate latitudes, and is strongly associated with higher levels of  
273 trait clustering. Critically, actual evapotranspiration is positively correlated with gross primary productivity (GPP)  
274 across terrestrial ecosystems [see Fig. 5d and Garbulsky *et al.* (2010)], which also peaks at intermediate latitudes  
275 across Europe. Consistently, our results were reproduced using GPP instead of ET, although both variables yield  
276 similar results. The agreement of model predictions with plant community data can be interpreted as a signature of  
277 competitive dominance in empirical communities in the environmentally conducive middle-range latitudes. Sig-  
278 nificant height clustering would be the trace that competition leaves on community assembly pattern by filtering  
279 out subdominant species. If species tend to be similar in maximum stem heights at mid-latitudes, we suggest that  
280 this height equalization is a signature of competitive dominance. This mechanism would have played a key role in  
281 shaping local species assemblages through years and year of common eco-evolutionary history. This result does  
282 not necessarily mean that competition is the main driver of community assembly. It rather highlights the potential  
283 role of competitive dominance, along with other processes, in the assembly of herbaceous communities at inter-  
284 mediate latitudes. On the contrary, as environmental conditions get increasingly extreme, no significant clustering  
285 in plant height is observed. Although the interplay between facilitation and competition is far from simple (Hart &  
286 Marshall, 2013), the harshness of extreme conditions likely override the effects of competition, and other processes  
287 such as species tolerances and facilitation (Maestre *et al.*, 2009, Valiente-Banuet & Verdú, 2007) may be critical  
288 community drivers at climatic extremes.

289 Although we introduced our conceptual framework based on “ideal plant growth conditions” (see Fig. 1a), the  
290 patterns presented for light and water availability are not necessarily unimodal nor universal for all plant species.

291 In general, many herbaceous plants grow efficiently when water availability is high, and temperatures are not  
292 extremely low. We acknowledge that there are exceptions to this rule. For example, environments that are too  
293 wet can lead plants to drown if their roots are saturated, which can cause early mortality and fast turnover (due  
294 to fungal infections, for instance). Likewise, high night time temperatures can lead to increases in respiration  
295 rates, thereby reducing overall growth. Many of these relationships are discussed in Lambers & Oliveira (2019).  
296 Climatic drivers can induce a variety of effects on plant growth different from the generic trend we used here to  
297 frame our contribution.

298 Throughout this work, species assemblages within each grid cell ( $\sim 50 \times 50$  km) have been defined as distinct  
299 communities. Current consensus about the concept of ecological community emphasizes the importance of biotic  
300 interactions. An ecological community is defined as a set of species that live in the same area and can potentially  
301 interact (Stroud *et al.*, 2015). In spite of the size and heterogeneity within each grid cell at the  $50 \times 50$  km spatial  
302 scale, cells are much smaller than the ecoregion they belong to, and are, of course, much more homogeneous, both  
303 in species composition and in environment, than the the ecoregion itself. Therefore, in principle, grid cells could  
304 be regarded as communities in an operational and relative sense. In addition, we assumed that the European Flora  
305 database represents species composition at a steady state, this is, we examined the stationary patterns resulting  
306 from eco-evolutionary processes associated to long time scales. Although real individual plants interact at much  
307 lower spatial scales, two species from the same ecoregion will eventually interact within a grid cell given enough  
308 time. The larger the temporal scale, the larger is the area where two species will have a chance to interact through  
309 generations and repeated dispersal events. The scale at which a set of local communities reveal information  
310 about underlying assembly processes is very often the regional scale (Diniz-Filho *et al.*, 2009, Olalla-Tárraga &  
311 Rodríguez, 2007, Ricklefs, 2015), which has led to the “regional community concept” (Ricklefs, 2008, 2011).

312 It is important to make a clear distinction between actual plant size and the species-level trait, “maximum stem  
313 height”. While a species-level trait is shaped by evolutionary constraints at longer temporal scales, actual plant size  
314 is determined by a host of contingent ecological constraints operating over shorter temporal scales. Although there  
315 is a large body of theory and experiments positively co-relating actual plant size and individual plant competition  
316 ability (Gaudet & Keddy, 1988, Weiner, 1993), there has been considerably less attention paid to the evolutionary  
317 establishment of functional trade-offs between different species-level traits (Adler *et al.*, 2014, Stearns, 1989).  
318 The common wisdom that competition favors taller plants may not always hold [for instance, in low-nutrient,  
319 competition-intensive, undisturbed habitats, see Tilman & Wedin (1991)]. Our analysis shows that height cluster-  
320 ing (and not height *per se*) at middle-range latitudes is a fingerprint of a balance between energy invested in either  
321 potential growth or other mechanisms that may help plants overcome competitors. For instance, when competitors  
322 are close relatives in dense herbaceous communities, selection may favor the evolution of a low leaf height. In  
323 these situations, “for short conspecific herbs to exclude competitors from a highly productive site, they must pos-  
324 sess alternative mechanisms to overcome competition, such as root competition or allelochemicals” (Givnish, 1982).

325 More generally, we would argue that functional trade-offs tend to evolve in regions of higher primary productivity,  
326 where the relative role of biological interactions (competition, parasitism, herbivory) is expected to be higher.

327 Competitive hierarchies have been theoretically investigated (Tilman, 1982, 2004), and empirically demon-  
328 strated in herbaceous plant communities at much smaller spatial scales (Stanley Harpole & Tilman, 2006, Tilman,  
329 1994, Tilman & Wedin, 1991). Other hierarchies have been also investigated in tree communities (Muller-Landau,  
330 2010). In some of these studies, particular trade-offs have been shown to maintain plant diversity and limiting  
331 similarity, which involves that competitive dominance may also lead to trait over-dispersion. However, these  
332 theoretical results arise as a consequence of a particular tradeoff definition. We believe our theoretical models  
333 are more general (Capitán *et al.*, 2020), and, in their diverse formulations, invariably lead to the opposite pat-  
334 tern: trait clustering. Interestingly, the relevant role of competitive dominance driven by species trait hierarchies  
335 has been also reported at much smaller spatial scales for forest trees along an altitudinal gradient in the French  
336 Alps (Kunstler *et al.*, 2012). Moreover, a study of the assembly of forest communities across East Asia shows  
337 that a phylogenetic-based species similarity index tends to be smaller the higher the minimum temperature of the  
338 coldest month is (Feng *et al.*, 2015). Although traits are not generally related to competitive abilities, and they  
339 are diverse in their functionality and in their response to environmental stress, these studies, together with our  
340 results, suggest that trait clustering is generally likely to occur where conditions for plant growth are less restric-  
341 tive. Our models indicate that the process underlying this pattern is competitive dominance rather than Darwin's  
342 competition-similarity hypothesis, although it is likely that community assembly for other taxa may be driven by  
343 other biotic or environmental filters. For instance, phytoplankton communities from estuarine ecosystems (Segura  
344 *et al.*, 2012) are more consistent with Darwin's seminal hypothesis since they appear to be driven by limiting  
345 similarity creating clumpy species coexistence (Pigolotti *et al.*, 2007, Scheffer & van Nes, 2006). Competitive hi-  
346 erarchies are, of course, not hard-wired in nature. Intransitivities may still play a key role in maintaining diversity  
347 in some systems (Allesina & Levine, 2011, Soliveres *et al.*, 2015, Zhang & Lamb, 2012).

348 In Capitán *et al.* (2020) we demonstrated how different coexistence *vs.* competition curves can be collapsed  
349 into a single curve. Here we showed that model predictions were quantitatively consistent with the observed  
350 decaying behavior of the probability of local coexistence as overall competition intensity increases. This general  
351 scaling behavior is typical for stochastic community models in the presence of both symmetrical (Capitán *et al.*,  
352 2015, 2017) and asymmetrical competition, as we showed in our previous publication (Capitán *et al.*, 2020). Here  
353 we tested this pattern at large geographical scales. The scaling allowed us to give a rough estimate of  $\hat{\rho}$ , an average  
354 ratio of inter- *vs.* intraspecific competition (see Fig 3a). Our indirect method is only able to estimate an average  
355  $\hat{\rho}$  across ecoregions. This average estimate is a highly aggregated parameter calculated from the whole data set,  
356 and therefore, characterizing European herbaceous plant communities. Although we expect high variability in  
357 its value between ecoregions, in a given ecoregion, the ratio of inter- *vs.* intra-competition is expected to be, on  
358 average, about 0.05. Whenever direct empirical estimates of the ratio of inter- *vs.* intra-competition are obtained, a

359 few similar species are typically studied using small-scale field experiments (Goldberg & Barton, 1992, Schoener,  
360 1983). It is, therefore, unsurprising that empirical estimations of this parameter tend to be higher than ours (Kraft  
361 *et al.*, 2015), but see also Volkov *et al.* (2009) and Wang *et al.* (2016). Being able to provide rough estimates of  
362 this parameter at regional scales is also a novel result from our analysis. Our results are in agreement with a recent  
363 study of trees across six forest biomes where the authors found that trait variation is mostly related to competitive  
364 imbalances tending to drive inferior competitors to extinction (Kunstler *et al.*, 2016). Further work is required to  
365 better relate the average ratio of inter- vs. intraspecific competition, which stabilizes species co-existence, to plant  
366 traits, and analyze how this aggregated parameter changes at increasing spatial scales and across taxa.

367 In this paper we have explored several predictions from theoretical models aimed at describing plant dynam-  
368 ics, which have been derived and carefully studied in Capitán *et al.* (2020). In total, we have contrasted four  
369 model predictions against reported herbaceous plant diversity across Europe. Our theoretical models represent  
370 a strong over-simplification of real plant community dynamics. However, in spite of disregarding the true com-  
371 plexity of these communities, our theory approach is useful, not only because it can reproduce macro-ecological,  
372 observational patterns with a small number of meaningful aggregated variables, but also because it provides new  
373 quantitative or qualitative predictions than may lead to new both empirical and observational studies. We look for-  
374 ward to seeing our simple trait-driven theory of competitive dominance being falsified (or not) in other ecological  
375 contexts. We humbly believe our message should be discussed within the context of the full scientific community  
376 interested in biodiversity research. Finding a theoretically robust and ecologically meaningful rapprochement be-  
377 tween theory and data at relevant scales remains a challenge for ecology, and we trust that our work will inspire  
378 new contributions in this direction.

## 379 **Acknowledgments**

380 The authors thank Mercedes Pascual for her insightful comments, and are indebted to Rohan Arthur, Han Olf, Joaquín Hortal, and Fernando Valladares for their constructive criticism on earlier versions of this manuscript. This  
381 work was funded by the Spanish ‘Ministerio de Economía y Competitividad’ under the projects CGL2012-39964  
382 and CGL2015-69043-P (DA, JAC), by the Spanish ‘Ministerio de Ciencia, Innovación y Universidades’ under the  
383 project PGC2018-096577-B-I00 (DA, JAC), and the Ramón y Cajal Fellowship program (RYC-2010-06545, DA).  
384 JAC acknowledges partial financial support from the Department of Applied Mathematics (Universidad Politécnica  
385 de Madrid). SC acknowledges financial support from Banco Santander through grant PR87/19-22582.

## 387 **References**

388 1.

389 Adler, P. B., Salguero-gómez, R., Compagnoni, A., Hsu, J. S., Ray-mukherjee, J., Adler, P. B., Salguero-gómez,

- 390 R., Compagnoni, A., Hsu, J. S. & Ray-mukherjee, J. (2014). Correction for Adler et al., Functional traits explain  
391 variation in plant life history strategies. *Proceedings of the National Academy of Sciences*, 111, 10019–10019.
- 392 2.
- 393 Allesina, S. & Grilli, J. (2020). Models for large ecological communities-a random matrix approach. In: *Theo-*  
394 *retical Ecology: Concepts and Applications* (ed. McCann, KS and Gellner, G). Oxford University Press, USA.  
395 ISBN 978-0-19-882428-2; 978-0-19-882429-9, pp. 74–92.
- 396 3.
- 397 Allesina, S. & Levine, J. M. (2011). A competitive network theory of species diversity. *Proc. Nat. Acad. Sci.*  
398 *USA*, 108, 5638–5642.
- 399 4.
- 400 Allesina, S. & Tang, S. (2012). Stability criteria for complex ecosystems. *Nature*, 483, 205–208.
- 401 5.
- 402 Allesina, S. & Tang, S. (2015). The stability-complexity relationship at age 40: a random matrix perspective.  
403 *Population Ecology*, 57, 63–75.
- 404 6.
- 405 Alonso, D., Etienne, R. S. & McKane, A. J. (2006). The merits of neutral theory. *Trends Ecol. Evol.*, 21, 451–457.
- 406 7.
- 407 Alonso, D., Pinyol-Gallemí, A., Alcoverro, T. & Arthur, R. (2015). Fish community reassembly after coral mass  
408 mortality: higher trophic groups are subject to increased rates of extinction. *Ecol. Lett.*, 18, 451–461.
- 409 8.
- 410 Bunin, G. (2017). Ecological communities with Lotka-Volterra dynamics. *PHYSICAL REVIEW E*, 95.
- 411 9.
- 412 Buuren, S. & Groothuis-Oudshoorn, K. (2011). MICE: Multivariate imputation by chained equations in r. *J. Stat.*  
413 *Softw.*, 45(3).
- 414 10.
- 415 Capitán, J. A., Cuenda, S. & Alonso, D. (2015). How similar can co-occurring species be in the presence of  
416 competition and ecological drift? *J. R. Soc. Interface*, 12, 20150604.
- 417 11.
- 418 Capitán, J. A., Cuenda, S. & Alonso, D. (2017). Stochastic competitive exclusion leads to a cascade of species  
419 extinctions. *J. Theor. Biol.*, 419, 137–151.

420 12.

421 Capitán, J. A., Cuenda, S. & Alonso, D. (2020). Competitive dominance in ecological communities: Modeling  
422 approaches and theoretical predictions. *J. Theor. Biol.*, 502, 110349.

423 13.

424 Chase, J. M., Kraft, N. J. B., Smith, K. G., Vellend, M. & Inouye, B. D. (2011). Using null models to disentangle  
425 variation in community dissimilarity from variation in  $\alpha$ -diversity. *Ecosphere*, 2, 24.

426 14.

427 Chesson, P. L. (2000). Mechanisms of maintenance of species diversity. *Ann. Rev. Ecol. Syst.*, 31, 343–366.

428 15.

429 Craine, J. R. & Dybzinski, R. (2013). Mechanisms of plant competition for nutrients, water and light. *Funct.*  
430 *Ecol.*, 27, 833–840.

431 16.

432 Díaz, S., Kattge, J., Cornelissen, J. H. C., Wright, I. J., Lavorel, S., Dray, S., Reu, B., Kleyer, M., Wirth, C.,  
433 Prentice, I. C., Garnier, E., Bönsch, G., Westoby, M., Poorter, H., Reich, P. B., Moles, A. T., Dickie, J., Gillison,  
434 A. N., Zanne, A. E., Chave, J., Wright, S. J., Sheremet'ev, S. N., Jactel, H., Christopher, B., Cerabolini, B., Pierce,  
435 S., Shipley, B., Kirkup, D., Casanoves, F., Joswig, J. S., Günther, A., Falczuk, V., Rüger, N., Mahecha, M. D. &  
436 Gorné, L. D. (2015). The global spectrum of plant form and function. *Nature*, 529, 1–17.

437 17.

438 Diniz-Filho, J. A. F., Rodríguez, M. Á., Bini, L. M., Olalla-Tarraga, M. Á., Cardillo, M., Nabout, J. C., Hortal,  
439 J. & Hawkins, B. A. (2009). Climate history, human impacts and global body size of Carnivora (Mammalia:  
440 Eutheria) at multiple evolutionary scales. *Journal of Biogeography*, 36, 2222–2236.

441 18.

442 Ellner, S. P., Snyder, R. E., Adler, P. B. & Hooker, G. (2019). An expanded modern coexistence theory for  
443 empirical applications. *Ecology Letters*, 22, 3–18.

444 19.

445 Falster, D. S. & Westoby, M. (2003). Plant height and evolutionary games. *Trends. Ecol. Evol.*, 18, 337–343.

446 20.

447 Feng, G., Mi, X., Eiserhardt, W. L., Jin, G., Sang, W., Lu, Z., Wang, X., and B. Li, X. L., Sun, I., Ma, K. &  
448 Svenning, J.-C. (2015). Assembly of forest communities across East-Asia. Insights from phylogenetic community  
449 structure and species pool scaling. *Scientific Reports*, 5, 9337.

450 21.

451 Garbulsky, M. F., Peñuelas, J., Papale, D., Ardö, J., Goulden, M. L., Kiely, G., Richardson, A. D., Rotenberg,



- 452 E., Veenendaal, E. M. & Filella, I. (2010). Patterns and controls of the variability of radiation use efficiency and  
453 primary productivity across terrestrial ecosystems. *Global Ecology and Biogeography*, 19, 253–267.
- 454 22.
- 455 Gaudet, C. L. & Keddy, P. A. (1988). A comparative approach to predicting competitive ability from plants trait.  
456 *Nature*, 334, 242–243.
- 457 23.
- 458 Givnish, T. (1995). Plant stems: biomechanical adaptation for energy capture and influence on species distribu-  
459 tions. In: *Plant stems: Physiology and Functional Morphology* (ed. Gartner, B.). Academic Press, Cambridge,  
460 Massachusetts, pp. 3–49.
- 461 24.
- 462 Givnish, T. J. (1982). Adaptive significance of leaf height in forest herbs. *Am. Nat.*, 112, 279–298.
- 463 25.
- 464 Goldberg, D. E. & Barton, A. M. (1992). Patterns and Consequences of Interspecific Competition in Natural  
465 Communities : A Review of Field Experiments with Plants. *The American naturalist*, 139, 771–801.
- 466 26.
- 467 Gotelli, N. J., Graves, G. R. & Rahbek, C. (2010). Macroecological signals of species interactions in the danish  
468 avifauna. *Proc. Nat. Acad. Sci. USA*, 107, 5030–5035.
- 469 27.
- 470 Haegeman, B. & Loreau, M. (2011). A mathematical synthesis of niche and neutral theories in community  
471 ecology. *J. Theor. Biol.*, 4, 263–271.
- 472 28.
- 473 Hart, S. P. & Marshall, D. J. (2013). Environmental stress, facilitation, competition, and coexistence. *Ecology*,  
474 94, 2719–2731.
- 475 29.
- 476 HilleRisLambers, J., Adler, P., Harpole, W., Levine, J. & Mayfield, M. M. (2011). Rethinking Community As-  
477 sembly Through the Lens of Coexistence Theory. *Annual Review of Ecology, Evolution, and Systematics*, 43,  
478 120830113150004.
- 479 30.
- 480 Holmgren, M., Scheffer, M. & Huston, M. A. (1997). The interplay of facilitation and competition in plant  
481 communities. *Ecology*, 78, 1966–1975.

482 31.

483 Hubbell, S. P. (2001). *The Unified Theory of Biodiversity and Biogeography*. Princeton University Press, Princeton.

484 32.

485 Jalas, J. & Suominen, J. (1964–1999). *Atlas Florae Europaeae. Distribution of vascular plants in Europe, Vol.*  
486 *1–12*. Societas Biologica Fennica Vanamo, Helsinki.

487 33.

488 King, D. A. (1990). The adaptive significance of tree height. *Am. Nat.*, 135, 809–828.

489 34.

490 Kleyer, M., Bekker, R. M., Knevel, I. C., Bakker, J. P., Thompson, K., Sonnenschein, M., Poschlod, P., Groe-  
491 nendael, J. M. V., Klimes, L., Klimesová, J., Klotz, S., Rusch, G. M., Hermy, M., Adriaens, D., Boedeltje, G.,  
492 Bossuyt, B., Dannemann, A., Endels, P., Götzenberger, L., Hodgson, J. G., Jackel, A.-K., Kühn, I., Kunzmann,  
493 D., Ozinga, W. A., Römermann, C., Stadler, M., Schlegelmilch, J., Steendam, H. J., Tackenberg, O., Wilmann, B.,  
494 Cornelissen, J. H. C., Eriksson, O., Garnier, E. & Peco, B. I. (2008). The leda traitbase: a database of life-history  
495 traits of the northwest european flora. *Journal of Ecology*, 96, 1266–1274.

496 35.

497 Kraft, N. J. B., Godoy, O. & Levine, J. M. (2015). Plant functional traits and the multidimensional nature of  
498 species coexistence. *Proceedings of the National Academy of Sciences*, 112, 797–802.

499 36.

500 Kunstler, G., Falster, D., Coomes, D. A., Hui, F., Kooyman, R. M., Laughlin, D. C., Poorter, L., Vanderwel,  
501 M., Vieilledent, G., Wright, S. J., Aiba, M., Baraloto, C., Caspersen, J., Cornelissen, J. H. C., Gourlet-Fleury,  
502 S., Hanewinkel, M., Herault, B., Kattge, J., Kurokawa, H., Onoda, Y., Peñuelas, J., Poorter, H., Uriarte, M.,  
503 Richardson, S., Ruiz-Benito, P., Sun, I.-F., Stahl, G., Swenson, N. G., Thompson, J., Westerlund, B., and  
504 M. A. Zavala, C. W., Zeng, H., Zimmerman, J. K., Zimmermann, N. E. & Westoby, M. (2016). Plant functional  
505 traits have globally consistent effects on competition. *Nature*, 529, 204–207.

506 37.

507 Kunstler, G., Lavergne, S., Courbaud, B., and G. Vieilledent, W. T., Zimmermann, N. E., Kattge, J. & Coomes,  
508 D. A. (2012). Competitive interactions between forest trees are driven by species' trait hierarchy, not phylogenetic  
509 or functional similarity: implications for forest community assembly. *Ecol. Lett.*, 15, 831–840.

510 38.

511 Lambers, H. & Oliveira, R. S. (2019). *Plant physiological ecology*. Springer.

512 39.

- 513 Law, R., Marrow, P. & Dieckmann, U. (1997). On evolution under asymmetric competition. *Evol. Ecol.*, 11,  
514 485–501.
- 515 40.
- 516 Lotka, A. J. (1925). *Elements of Physical Biology*. Williams and Wilkins, Maryland, USA.
- 517 41.
- 518 MacArthur, R. H. & Wilson, E. O. (1967). *The theory of island biogeography*. Princeton University Press,  
519 Princeton.
- 520 42.
- 521 Maestre, F. T., Callaway, R. M., Valladares, F. & Lortie, C. J. (2009). Refining the stress-gradient hypothesis for  
522 competition and facilitation in plant communities. *Journal of Ecology*, 97, 199–205.
- 523 43.
- 524 May, R. M. (1972). Will a large complex system be stable? *Nature*, 238, 413–414.
- 525 44.
- 526 Mayfield, M. M. & Levine, J. M. (2010). Opposing effects of competitive exclusion on the phylogenetic structure  
527 of communities. *Ecol. Lett.*, 13, 1085–1093.
- 528 45.
- 529 McKane, A. J., Alonso, D. & Solé, R. V. (2000). A mean field stochastic theory for species rich assembled  
530 communities. *Phys. Rev. E*, 62, 8466–8484.
- 531 46.
- 532 Midgley, J. J. (2003). Is bigger better in plants? The hydraulic costs of increasing size in trees. *Trends. Ecol.*  
533 *Evol.*, 18, 5–6.
- 534 47.
- 535 Mu, Q., Zhao, M. & Running, S. W. (2011). Improvements to a MODIS global terrestrial evapotranspiration  
536 algorithm. *Remote Sens. Environ.*, 115, 1781–1800.
- 537 48.
- 538 Muller-Landau, H. (2010). The tolerance-fecundity trade-off and the maintenance of diversity in seed size. *Proc.*  
539 *Nat. Acad. Sci. USA*, 107, 4242–4247.
- 540 49.
- 541 Olalla-Tárraga, M. Á. & Rodríguez, M. Á. (2007). Energy and interspecific body size patterns of amphibian  
542 faunas in Europe and North America: Anurans follow Bergmann's rule, urodeles its converse. *Global Ecology*  
543 *and Biogeography*, 16, 606–617.

544 50.

545 Olson, D. M., Dinerstein, E., Wikramanayake, E. D., Burgess, N. D., Powell, G. V. N., Underwood, E. C., D'amico,  
546 J. A., Itoua, I., Strand, H. E., Morrison, J. C., Loucks, C. J., Allnutt, T. F., Ricketts, T. H., Kura, Y., Lamoreux,  
547 J. F., Wettengel, W. W., Hedao, P. & Kassem, K. R. (2001). Terrestrial ecoregions of the world: A new map of life  
548 on Earth. *BioScience*, 51, 993–938.

549 51.

550 Ontiveros, V. J., Capitán, J. A., Arthur, R., Casamayor, E. O. & Alonso, D. (2019). Colonization and extinction  
551 rates estimated from temporal dynamics of ecological communities: The island r package. *Methods in Ecology*  
552 *and Evolution*, 10, 1108–1117.

553 52.

554 Ordonez, A., Wright, I. J. & Olf, H. (2010). Functional differences between native and alien species: A global-  
555 scale comparison. *Fun. Ecol.*, 24, 1353–1361.

556 53.

557 Pigolotti, S., López, C. & Hernández-García, E. (2007). Species clustering in competitive Lotka-Volterra models.  
558 *Phys. Rev. Lett.*, 98, 1–4.

559 54.

560 Ricklefs, R. E. (2008). Disintegration of the ecological community. *Am. Nat.*, 172, 741–750.

561 55.

562 Ricklefs, R. E. (2011). Applying a regional community concept to forest birds of eastern North America. *Pro-*  
563 *ceedings of the National Academy of Sciences of the United States of America*, 108, 2300–2305.

564 56.

565 Ricklefs, R. E. (2015). Intrinsic dynamics of the regional community. *Ecology Letters*, 18, 497–503.

566 57.

567 Rosindell, J., Hubbell, S. P. & Etienne, R. S. (2011). The unified neutral theory of biodiversity and biogeography  
568 at age ten. *Trends Ecol. Evol.*, 26, 451–457.

569 58.

570 Ryan, M. G. & Yoder, B. J. (1997). Hydraulic limits to tree height and tree growth. *Bioscience*, 47, 235–242.

571 59.

572 Scheffer, M. & van Nes, E. H. (2006). Self-organized similarity, the evolutionary emergence of groups of similar  
573 species. *Proceedings of the National Academy of Sciences of the United States of America*, 103, 6230–6235.

574 60.

575 Schoener, T. W. (1983). Field Experiments on Interspecific Competition. *The American naturalist*, 122, 240–285.

576 61.

577 Segura, A. M., Kruk, C., Calliari, D., García-Rodríguez, F., Conde, D., Widdicombe, C. E. & Fort, H. (2012).  
578 Competition drives clumpy species coexistence in estuarine phytoplankton. *Scientific Reports*, 3, 1037.

579 62.

580 Serván, C. A., Capitán, J. A., Grilli, J., Morrison, K. E. & Allesina, S. (2018). Coexistence of many species in  
581 random ecosystems. *Nature Ecology and Evolution*, 2, 1237.

582 63.

583 Solé, R. V., Alonso, D. & McKane, A. J. (2000). Scaling in a network model of multispecies communities.  
584 *Physica A*, 286, 337–344.

585 64.

586 Soliveres, S., Maestre, F. T., Ulrich, W., Manning, P., Boch, S., Bowker, M. A., Prati, D., Delgado-Baquerizo,  
587 M., Quero, J. L., Schöning, I., Gallardo, A., Weisser, W., Müller, J., Socher, S. A., García-Gómez, M., Ochoa, V.,  
588 Schulze, E. D., Fischer, M. & Allan, E. (2015). Intransitive competition is widespread in plant communities and  
589 maintains their species richness. *Ecology Letters*, 18, 790–798.

590 65.

591 Stanley Harpole, W. & Tilman, D. (2006). Non-neutral patterns of species abundance in grassland communities.  
592 *Ecology Letters*, 9, 15–23.

593 66.

594 Stearns, S. C. (1989). Evolution in life-history Trade-offs. *Functional Ecology*, 3, 259–268.

595 67.

596 Stroud, J. T., Bush, M. R., Ladd, M. C., Nowicki, R. J., Shantz, A. A. & Sweatman, J. (2015). Is a community still  
597 a community? Reviewing definitions of key terms in community ecology. *Ecology and Evolution*, 5, 4757–4765.

598 68.

599 Swenson, N. G., Enquist, B. J., Pither, J., Kerkhoff, A. J., Boyle, B., Weiser, M. D., Elser, J. J., Fagan, W. F.,  
600 Forero-Montaña, J., Fyllas, N., Kraft, N. J. B., Lake, J. K., Moles, A. T., Patiño, S., Phillips, O. L., Price, C. A.,  
601 Reich, P. B., Quesada, C. A., Stegen, J. C., Valencia, R., Wright, I. J., Wright, S. J., Andelman, S., Jorgensen,  
602 P. M., Lacher, T. E., Monteagudo, A., Núñez-Vargas, M. P., Vasquez-Martínez, R. & Nolting, K. M. (2012). The  
603 biogeography and filtering of woody plant functional diversity in North and South America. *Global Ecology and*  
604 *Biogeography*, 21, 798–808.

605 69.

606 Tilman, D. (1982). *Resource Competition and Community Structure*. Princeton University Press, Princeton, NJ.

607 70.

608 Tilman, D. (1994). Competition and Biodiversity in Spatially Structured Habitats. *Ecology*, 75, 2–16.

609 71.

610 Tilman, D. (2004). Niche tradeoffs, neutrality, and community structure: A stochastic theory of resource compe-  
611 tition, invasion, and community assembly. *Proc. Nat. Acad. Sci. USA*, 101, 10854–10861.

612 72.

613 Tilman, D. & Wedin, D. (1991). Plant Traits and Resource Reduction For Five Grasses Growing on a Nitrogen  
614 Gradient. *Ecology*, 72, 685–700.

615 73.

616 Triadó-Margarit, X., Capitán, J. A., Menéndez-Serra, M., Ortiz-Álvarez, R., Ontiveros, V. J., Casamayor, E. O.  
617 & Alonso, D. (2019). A Randomized Trait Community Clustering approach to unveil consistent environmental  
618 thresholds in community assembly. *The ISME Journal*, 13.

619 74.

620 Valiente-Banuet, A. & Verdú, M. (2007). Assembly through facilitation can increase the phylogenetic diversity of  
621 plant communities. *Ecol. Lett.*, 10, 1029–1036.

622 75.

623 Violle, C., Nemegut, D. R., Pu, Z. & Jiang, L. (2011). Phylogenetic limiting similarity and competitive exclusion.  
624 *Ecol. Lett.*, 14, 782–787.

625 76.

626 Volkov, I., Banavar, J. R., Hubbell, S. P. & Maritan, A. (2009). Inferring species interactions in tropical forests.  
627 *Proc. Nat. Acad. Sci. USA*, 106, 13854–13859.

628 77.

629 Volterra, V. (1926). Variazioni e fluttuazioni del numero d'individui in specie animali conviventi. *Mem. Acad.*  
630 *Naz. Lincei*, 2, 31–113.

631 78.

632 Wang, X. G., Wiegand, T., Kraft, N. J. B., Swenson, N. G., Davies, S. J., Hao, Z. Q., Howe, R., Lin, Y. C., Ma,  
633 K. P., Mi, X. C., Su, S. H., Sun, I. F. & Wolf, A. (2016). Stochastic dilution effects weaken deterministic effects  
634 of niche-based processes in species rich forests. *Ecology*, 97, 347–360.

635 79.

636 Webb, C. O., Ackerly, D. D., McPeck, M. A. & Donoghue, M. J. (2002). Phylogenies and community ecology.  
637 *Ann. Rev. Ecol. Syst.*, 33, 475–505.

638 80.

639 Weiner, J. (1993). Competition among plants. *Treballs de la Societat Catalana de Biologia*, 44, 99–109.

640 81.

641 Zhang, S. & Lamb, E. G. (2012). Plant competitive ability and the transitivity of competitive hierarchies change  
642 with plant age. *Plant Ecology*, 213, 15–23.

## 643 **Figure captions**

**Figure 1. Conceptual framework for maximum height resulting from a trade-off between investing energy either in potential growth, or in any other alternative, non-size-related strategy.** In panel **a**, we illustrate latitudinal patterns of potential light and water availability. The latitudinal gradient of actual evapotranspiration (ET) is also shown along with the expected role of biotic interactions in determining community dynamics. At middle-range latitudes, we expect competitive hierarchies to be at their maximum due to a greater relative role of species interactions. Panel **b** shows how the trade-off between potential growth and any alternative mechanism not related to size can be included in a spatially-explicit model: species that are either good at growing taller or in investing energy in allelopathy remain short, but cause incremental death of their heterospecific neighbors. As an outcome of this trade-off, the model predicts the dominance of taller, mid-sized, or shorter plants at stationarity (panel **c**).

**Figure 2. Geographical description of plant data across European ecoregions.** **a**, 25 different habitats covering most of Europe are shown in the map and listed below. Ecoregions are regarded as a pool comprising all plant species observed in that region. **b**, The Military Grid Reference System divides ecoregions in grid cells, each one considered as an assemblage formed by a species sample of the pool.

**Figure 3. The implicit model predicts a power-law decay** regardless of the ecoregion size  $S$ , which permits fitting a power law to data ( $r^2 = 0.51$ ,  $p < 10^{-3}$ , 95% confidence lines are shown). In order to match the empirical exponent  $\gamma$  we need to choose the immigration rate  $\mu = 5$ , the net growth rate  $\alpha = 50$  and the carrying capacity  $K = 1000$ . To match the starting point of the decay we need to set  $\hat{\rho} = 0.04$  in the calculation of  $\rho_{ij}$ . For completeness, we have reproduced here model expectations (triangles) for different pool sizes. Data colors match ecoregion codes in Fig. 2.



**Figure 4. Empirical randomization tests.** Over half of the ecoregions are consistent with model predictions as the distributions (Tukey boxplots) lie in the 5% range of significant clustering (Methods). We present here distributions of p-values across local communities in every ecoregion. Shaded areas would represent threshold p-values for two one-tailed tests where the hypothesis of trait clustering and over-dispersion, in blue and pink, respectively, are represented on the same plot. Data colors in panels **a** and **c** match codes in Fig. 2.

**Figure 5. Linking height clustering to geographical and environmental variables.** **a**, Variation in the clustering index ( $q$ ) with latitude ( $\varphi$ ). Quadratic fit:  $r^2 = 0.63$ ,  $p < 10^{-3}$ . **b**, Latitudinal variation in mean annual actual evapotranspiration (ET) data. Quadratic weighted regression:  $r^2 = 0.63$ ,  $p < 10^{-3}$ . The shaded areas in panels **a** and **b** represent the latitudinal range for which the adjusted dependence  $q(\varphi) \geq 0.7$ , where both height clustering and evapotranspiration are maximal. **c**, Linear weighted regression for ET as a function of the clustering index;  $r^2 = 0.49$ ,  $p < 10^{-3}$ . **d**, Correlation between mean gross primary productivity (GPP) and mean annual ET; linear weighted fit:  $r^2 = 0.73$ ,  $p < 10^{-3}$ . In the first four panels, the radius of each circle is proportional to the clustering index. Symbol colors refer to ecoregions (Fig. 2). All the fits show the 95% confidence bands. **e**, Geographical distribution of clustering indices for ecoregions across Europe.

**Figure 6. Two predictions of the explicit model tested against data.** **a**, Correlation of cell-averaged height (relative to ecoregion means) and mean annual ET by ecoregion (colors used for data match codes in Fig. 2). **b**, Correlation coefficient obtained in **a** vs. latitude. Circle radii are proportional to clustering indices. Observe that positive correlations tend to associate with high clustering index (with some exceptions) and middle-range latitude (quadratic fit:  $r^2 = 0.44$ ,  $p = 0.001$ ). **c**, Clustering patterns of an ecoregion characterized by high clustering index (Atlantic mixed forests) were analyzed at increasing aggregation scales. Communities were defined by increasingly aggregating contiguous  $50 \times 50$  km cells. Below a critical aggregation scale (eleventh log-area bin, which corresponds to  $10^5$  km<sup>2</sup>), randomization tests show strong signals of clustering. The inset in **c** represents a down-scaling of randomization tests. Clustering patterns robustly persist at smaller spatial scales.

644 **Figures**

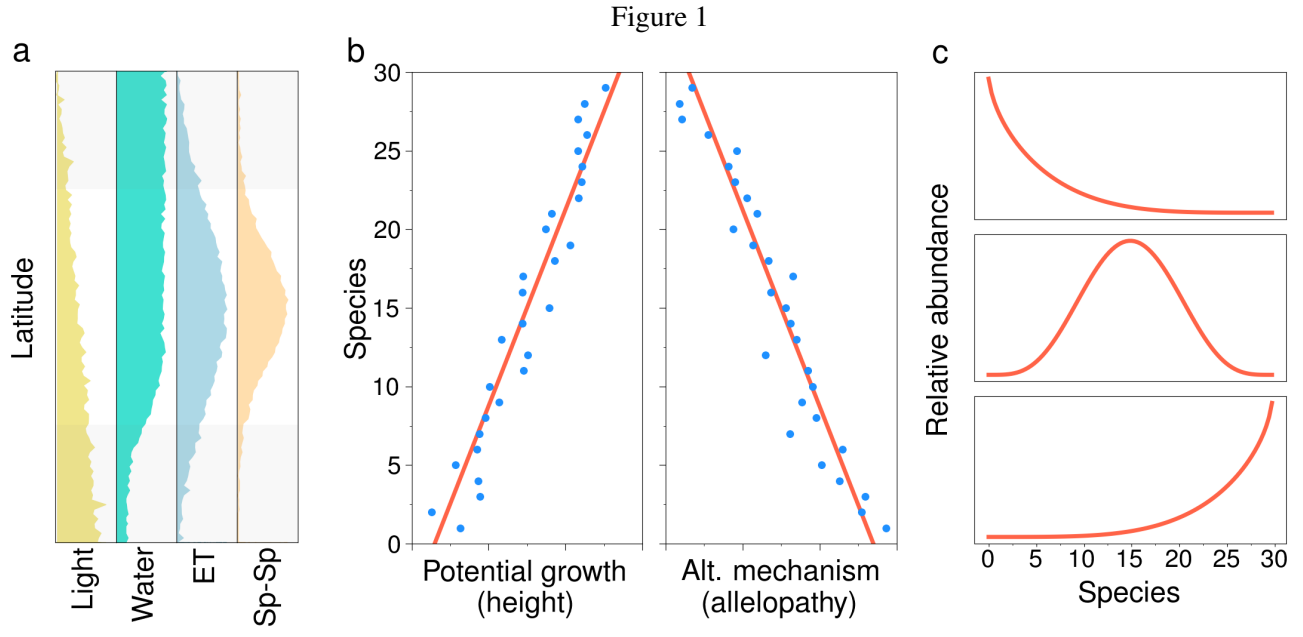

Figure 2

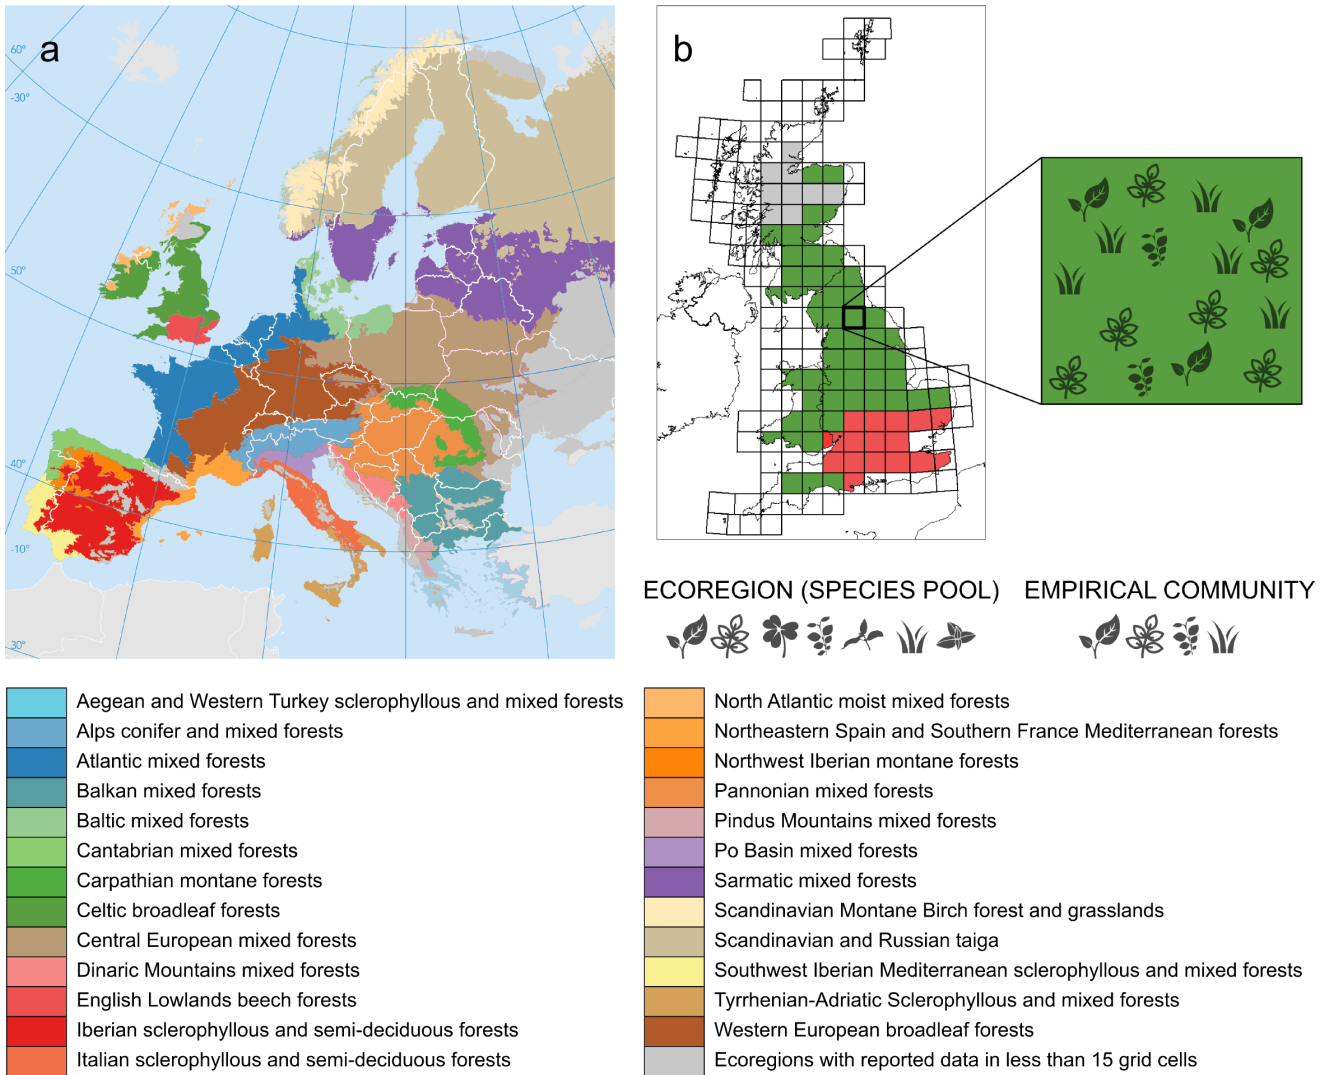

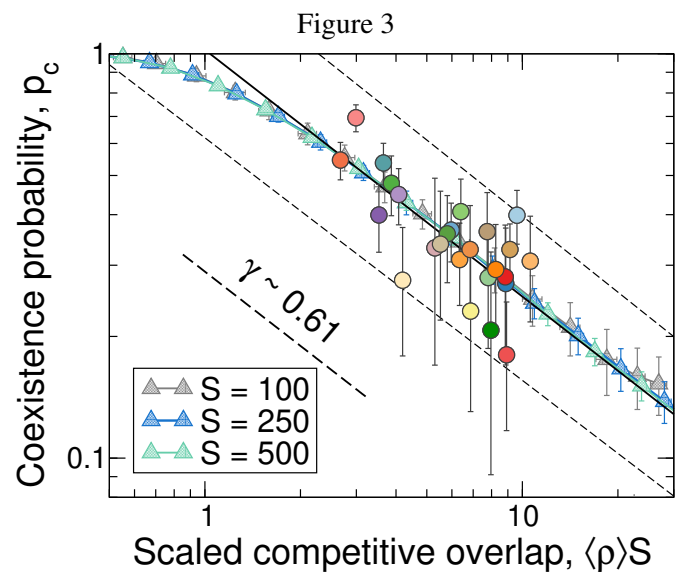

Figure 4

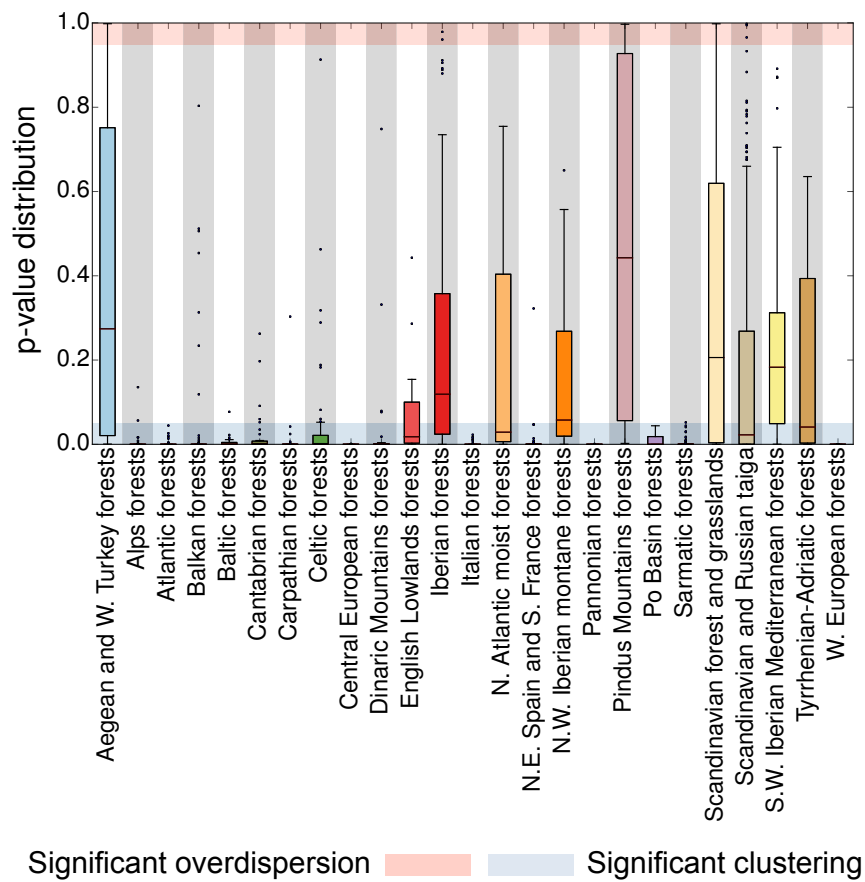

Figure 5

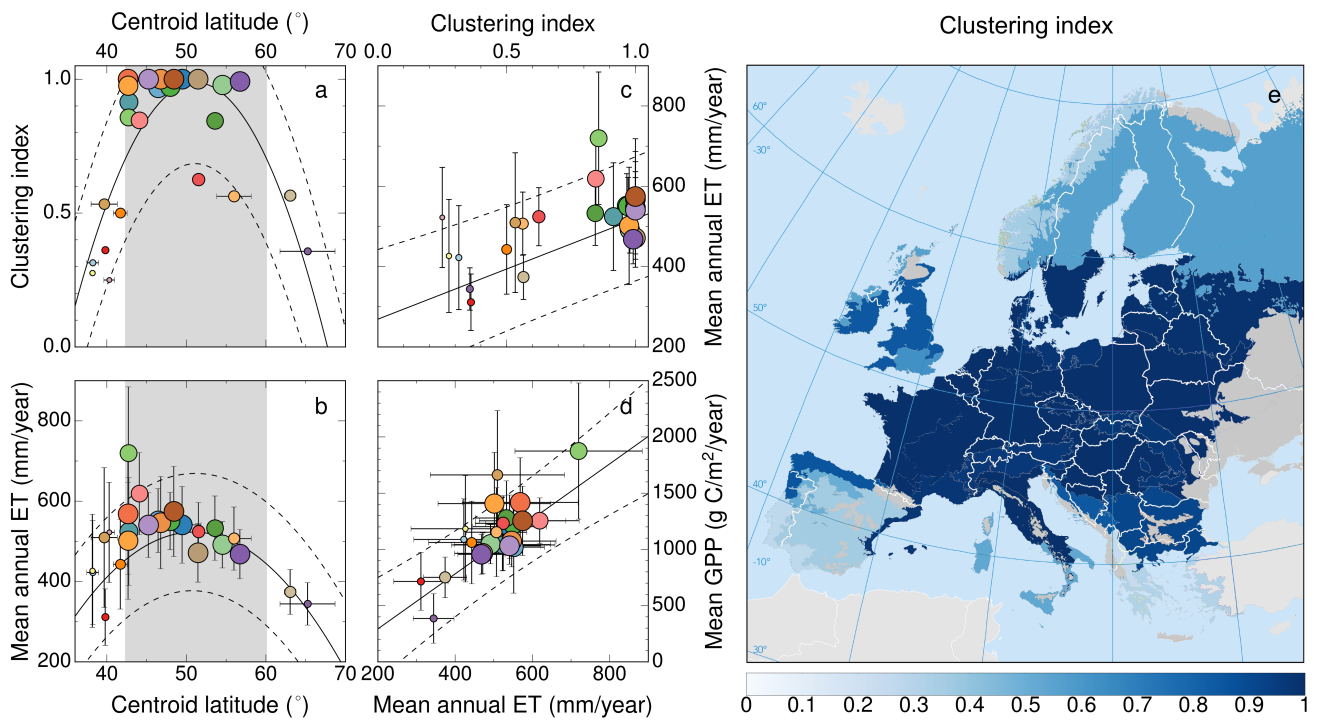

Figure 6

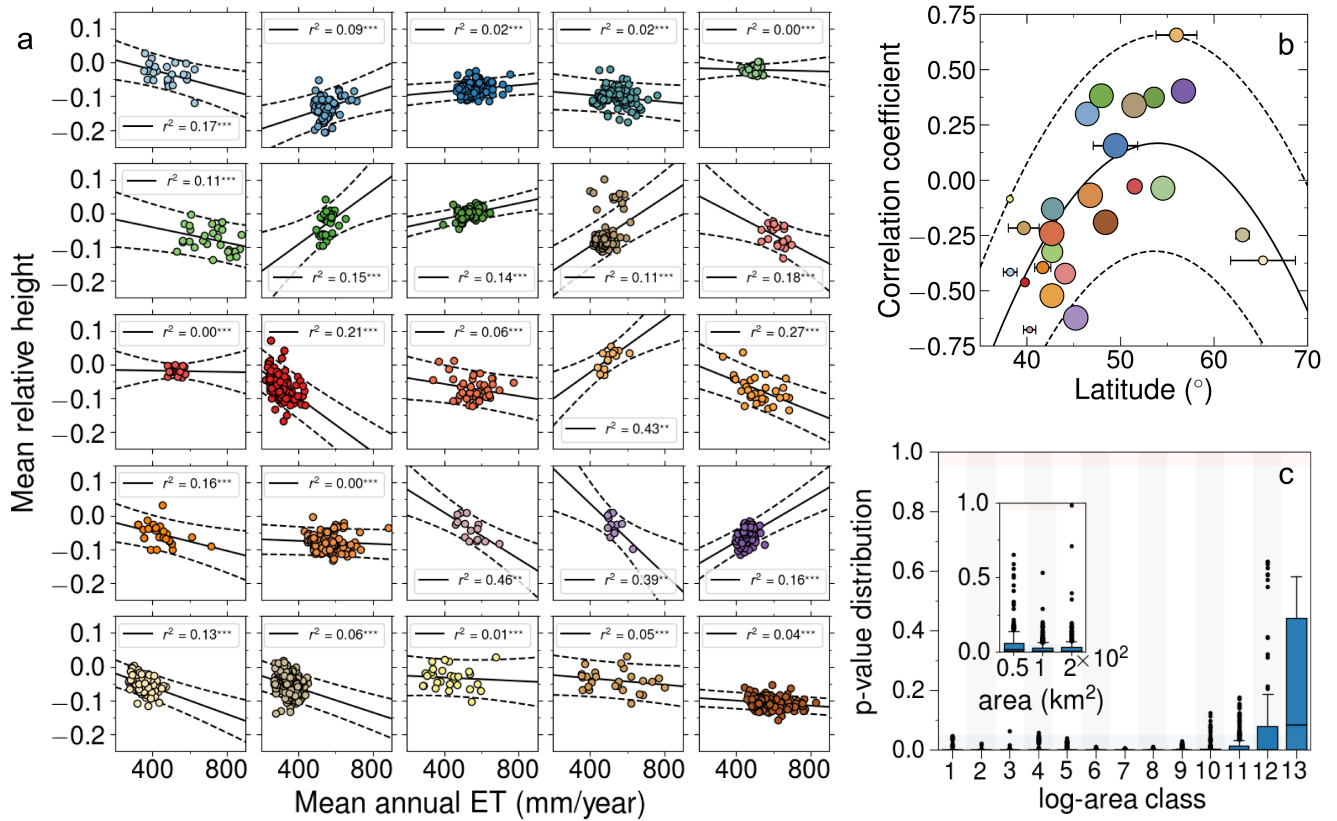

Source: https://www.biorxiv.org/content/biorxiv/early/2021/08/19/2020.01.20.913277.full.pdf
